1 **Type I-E CRISPR-Cas system as an immune system in a eukaryote**

2

3 Devashish Rath<sup>1,2\*</sup>, Lina Amlinger<sup>2</sup>, Gargi Bindal<sup>1</sup>, Magnus Lundgren<sup>2#</sup>

4

5 <sup>1</sup>Molecular Biology Division, Bhabha Atomic Research Centre, Mumbai, India<sup>a</sup>;

6 <sup>2</sup>Department of Cell and Molecular Biology, Uppsala University, Uppsala, Sweden<sup>b</sup>

7

8 #Address correspondence to Magnus Lundgren, [magnus.lundgren@icm.uu.se](mailto:magnus.lundgren@icm.uu.se)

9 \*Present address: Molecular Biology Division, Bhabha Atomic Research Centre,

10 Mumbai, India.

11

12 **Abstract**

13 Defense against viruses and other mobile genetic elements (MGEs) is important in  
14 many organisms. The CRISPR-Cas systems found in bacteria and archaea constitute  
15 adaptive immune systems that acquire the ability to recognize MGEs by introducing  
16 nucleic acid samples, spacers, in the CRISPR locus. The CRISPR is transcribed and  
17 processed, and the produced CRISPR RNAs guide Cas proteins to degrade matching  
18 nucleic acid sequences. No CRISPR-Cas system is found to occur naturally in  
19 eukaryotic cells but here we demonstrate interference by type I-E CRISPR-Cas  
20 system from *Escherichia coli* introduced in *Saccharomyces cerevisiae*. The designed  
21 CRISPR arrays are properly expressed and processed in *S. cerevisiae*. Targeted  
22 plasmids display reduced transformation efficiency, indicative of DNA cleavage.  
23 Unlike *e.g.* Cas9-based systems, which can be used to inactivate MGEs in eukaryotes  
24 by introducing specific mutations, type I-E systems processively degrade the target.  
25 The type I-E system thus allows for defense without knowledge of MGE gene  
26 function. The reconstituted CRISPR-Cas system in *S. cerevisiae* can also function as a  
27 basic research platform for testing the role of various factors in the interference  
28 process.

29

30 **Introduction**

31 Viruses and other mobile genetic elements (MGEs) are potential threats to most  
32 studied cellular organisms, by acting as predators or by reducing fitness. In response,  
33 organisms have evolved multiple defense strategies, largely grouped into innate and  
34 adaptive systems. Innate systems are characterized by being activated by certain  
35 preset features of infection. Adaptive systems, on the other hand, can learn to  
36 recognize previously unrecognized pathogens. For a long time the vertebrate adaptive

37 immune system was the only known example, but the CRISPR-Cas systems of  
38 archaea and bacteria have been demonstrated to be a *bona fide* adaptive immune  
39 systems (1). All studied CRISPR-Cas systems are based on short DNA or RNA  
40 sequences (protospacers) from *e.g.* virus genomes being stored as DNA spacers in the  
41 Clustered Regularly Interspaced Short Palindromic Repeats (CRISPR) locus. A long  
42 precursor CRISPR transcript (pre-crRNA) is processed into CRISPR RNA (crRNA)  
43 and used by CRISPR associated (Cas) protein effectors to locate and destroy matching  
44 targets. The target can be DNA or RNA depending on the type of CRISPR-Cas  
45 system (2, 3). CRISPR-Cas systems are grouped into class 1 and 2, depending on if  
46 the effector is a protein complex or a single enzyme, respectively. Each class contains  
47 several functionally different types of systems (4).

48

49 Programmable nucleases such as Zinc finger nucleases (ZFNs), transcription activator  
50 like effector nucleases (TALENs), and Cas9 can function as anti-MGE systems in  
51 eukaryotic cells by inducing crippling mutations. Particularly Cas9, which has  
52 revolutionized gene editing in eukaryotes, has been demonstrated to effectively target  
53 several human viruses (5). In basic Cas9 technology DNA cleavage is directed by a  
54 single guide RNA (sgRNA). The break can be repaired by Homology Directed Repair  
55 (HDR) or error-prone Non-Homologous End Joining (NHEJ) (2). In the case of  
56 viruses, if a gene is repaired by the error-prone NHEJ it may be inactivated, resulting  
57 in inability of the virus to proliferate, as demonstrated for *e.g.* HIV1 (6). However,  
58 this approach requires thorough understanding of the virus' biology, as randomly  
59 targeting a virus gene does not guarantee reduced proliferation.

60

61 In this study we take advantage of the properties of the type I-E CRISPR-Cas system  
62 to test its ability to function as an anti-MGE system in eukaryotes that do not require  
63 understanding of target gene function. The key factors in target degradation by type I-  
64 E systems are the Cascade protein-RNA complex and the Cas3 enzyme. Cascade  
65 processes and retains crRNA, and uses the crRNA to identify DNA targets flanked by  
66 a protospacer adjacent motif (PAM) (7). Once a target is identified, the Cas3 enzyme  
67 is recruited to degrade the target. Unlike the DNA-targeting class 2 enzymes, which  
68 perform blunt or staggered double-stranded cut, Cas3 destroys the target in a  
69 processive manner (8). This property makes Cascade-Cas3 a poor choice for gene  
70 editing but highly suitable for removing virus genomes as repair that restore virus  
71 function is less likely to occur after processive degradation. As the effect should be  
72 the same irrespective of target sequence, Cascade-Cas3 would be especially  
73 advantageous for use against poorly characterized viruses. A type I-E system in a  
74 eukaryote could also be beneficial for basic research. It allows testing the role and  
75 effect of Cas and non-Cas proteins, as well as other factors, for their effect on  
76 CRISPR-Cas immunity, independent of their native cellular background.

77

78 As a proof-of-concept we adapted the type I-E system from *E. coli* for use as a  
79 programmable anti-MGE system in *S. cerevisiae*, chosen for its role as a eukaryotic  
80 model system. As targets we use plasmids, which allow comparison with similar  
81 experiments in bacterial systems (9-12).

82

## 83 **Results**

84 Design and reconstitution of type I-E CRISPR-Cas system in *S. cerevisiae*

85 Our basic system for expressing Cascade, Cas3, and crRNA in *S. cerevisiae* was  
86 different plasmids from the pRSGal series, where each produced one of the  
87 components (fig. 1A), but we also designed several alternative systems (fig. 1B-D).  
88 pCascade, expressing Cascade proteins, had three cassettes with different *cas* genes  
89 under control of bidirectional Gal promoters. The cassettes were separated by *S.*  
90 *cerevisiae* CYC1 terminator to prevent formation of antisense transcripts.  
91 For production of targeting crRNA, pCRISPR was constructed by inserting a CRISPR  
92 array containing four copies of the J3 spacer (4×J3) (13) under control of a Gal  
93 promoter, with a CYC1 terminator preventing read-through.  
94 For expression of the Cas3 nuclease we designed pCas3 by cloning *E. coli cas3* under  
95 a Gal promoter. An alternative version of the plasmid, pCas3::Cse1, carried a  
96 naturally occurring *cas3-cse1* fusion (8). Co-expression of this plasmid with pCascade  
97 would result in incorporation of the Cas3-Cse1 fusion in a part of the Cascade  
98 complexes. To test the effect of different crRNAs we combined a CRISPR with two  
99 alternative spacers, J1 and J2, with Cas3 or Cas3-Cse1 fusion to generate  
100 pCRISPR+Cas3 and pCRISPR+Cas3::Cse1, respectively.  
101 Two different target plasmids were designed. pTargetHigh carried a phage Lambda J  
102 gene fragment containing the PAMs and protospacers for J1, J2, and J3 (table S4) on  
103 a high copy vector. pTargetLow, carried the same J fragment on a low copy  
104 backbone. Empty vectors lacking the J fragment were used as non-targeted controls.

105

#### 106 Processing of crRNA in *S. cerevisiae*

107 To test function of crRNA processing in yeast we analyzed the formation of crRNA in  
108 *S. cerevisiae* W303 after expression from pCascade, pCas3, and pCRISPR was  
109 induced by addition of galactose. The analysis was performed by northern blot with a

110 radioactively labeled probe complementary to the J3 spacer. The assay demonstrates  
111 formation of a 61 nt RNA species, equal in size to crRNA produced in *Escherichia*  
112 *coli*. The amount of crRNA produced was assayed two, four, and five hours after  
113 induction, and crRNA was detected at all time points (fig. 2A).

114

#### 115 Interference by CRISPR-Cas in *S. cerevisiae*

116 Functionality of Cascade-Cas3 interference was assessed by comparing  
117 transformation efficiency (TE) of a plasmid targeted by the CRISPR-Cas system with  
118 that of the same plasmid lacking the target fragment. Transformations were routinely  
119 done 240 min after induction of *cas* and CRISPR expression. Using pCas3, pCascade,  
120 and pCRISPR in *S. cerevisiae* W303, a 47% decrease in TE of pTargetHigh was  
121 observed (fig. 2B). Tests with 150 min induction resulted in similar results (fig. S1).

122 Alternative systems for expressing Cascade, Cas3, and crRNA were tested for  
123 improved target interference. Cas3-Cse1 fusion construct, pCas3::Cse1, co-expressed  
124 with pCascade and pCRISPR resulted in approximately 73.5% reduction in TE of  
125 pTargetHigh in *S. cerevisiae* W303 (fig. 2C). Expression of pCRISPR+Cas3 or  
126 pCRISPR+Cas3::Cse1 together with pCascade in *S. cerevisiae* BY418 resulted in  
127 88.6 % and 88.7 % reduction in TE of pTargetLow, respectively (fig. 2D and 2E).

128

#### 129 Effect of interference

130 Interference assays demonstrated that CRISPR-Cas targeting reduced TE but  
131 transformants were still observed on selective plates. These transformants could be  
132 carrying target plasmids that had not been cleaved by Cascade-Cas3, plasmids that  
133 had been cleaved but subsequently been repaired or plasmids that had acquired escape  
134 mutations in the region targeted by CRISPR. NHEJ repair or presence of different

135 escape mutations would result in target sequence heterogeneity in the population of  
136 transformed plasmids. To determine sequence heterogeneity in the transformed  
137 plasmids we performed the Surveyor assay, which cleave DNA with mismatched  
138 bases formed by denaturing and reannealing DNA strands with sequence differences.  
139 The target region of pTargetHigh was amplified by PCR and analyzed by Surveyor  
140 assay. Sequence heterogeneity at J3 target site would result in two cleavage  
141 fragments, both of about 160-170 bp. No such cleavage products could be detected in  
142 strains expressing pCRISPR, pCascade and pCas3, similar to interference-negative  
143 control strains (fig. S2).

144

## 145 **Discussion**

146 We demonstrate successful reconstitution of bacterial type I-E CRISPR-Cas  
147 interference in the eukaryote *S. cerevisiae*. We detect accurate processing of crRNA  
148 by northern blot and, importantly, a reduction of target plasmid transformation rate  
149 compared to a non-targeted control plasmid. We could not detect sequence  
150 heterogeneity in plasmids recovered from transformed cells, demonstrating that the  
151 level of interference observed was due to the activity of Cascade-Cas3 and not by  
152 varying levels of escape mutations in the target. The lack of sequence heterogeneity  
153 also demonstrates that NHEJ repair could not be detected, though this type of repair is  
154 rare in *S. cerevisiae*. Our results suggest that the programmable processive DNA  
155 degradation by type I-E CRISPR-Cas system can be restored in eukaryotic cells.

156

157 In our initial design, Cascade, Cas3, and pre-crRNA is expressed from different  
158 plasmids, and this resulted in 50% reduction in plasmid transformation rate. To  
159 improve activity we developed improved systems. Co-expression of a Cas3-Cse1

160 fusion results in a subpopulation of Cascade complexes permanently co-localized with  
161 Cas3, which reduced transformation by 73.5 %, a level similar to when J3 crRNA is  
162 used against phage Lambda in *E. coli* expressing the LeuO activator (13). We  
163 hypothesize that this fusion improves the kinetics of target degradation, as the factors  
164 do not need to find each other. Further, we altered the CRISPR to produce two  
165 different crRNA targeting the plasmid to potentially increase activity and at the same  
166 time expressed Cas3 and pre-crRNA from the same plasmid to reduce the load of  
167 carrying multiple plasmids. These modifications resulted in further reduction of  
168 transformation, and combination of all improvements result in about one-in-ten  
169 plasmids escaping degradation.

170

171 Different crRNAs result in different levels of CRISPR-Cas system interference (7, 14,  
172 15), so other spacer sequences may further increase efficiency of target degradation in  
173 yeast. We also speculate that the Cascade and Cas3 in the absence of nuclear  
174 localization signals (NLS) locate to the cytoplasm, thus allowing only a narrow  
175 window of opportunity to destroy their target plasmids while they are en route to the  
176 nucleus. This likely causes a reduction in target access and interference compared to  
177 bacteria and archaea, which typically lack a membrane around their nucleoid. Other  
178 factors that may further improve interference in *S. cerevisiae* are increased expression  
179 of Cas protein and pre-crRNA, codon optimization, prevention of detrimental post-  
180 translational modification of Cas proteins, and co-expression of *E. coli* host factors  
181 that may assist interference.

182 The large type I-E system is more difficult to establish heterologously than the more  
183 compact class 2 systems. However, complete target clearance by type I systems is a  
184 distinct advantage over inactivation of MGEs by mutagenesis using class 2 systems.



185 To inactivate an MGE by mutation, thorough understanding of the MGEs function is  
186 required to find a key component to target. Also, compared to Cas9-based systems,  
187 type I systems can easily target several different sequences by adding more spacer-  
188 repeat units to the CRISPR (14, 16), while current applications of Cas9 in eukaryotes  
189 require insertion of multiple single guide RNA genes to achieve multiplexing (17).  
190 Another benefit of our establishment of a type I-E system in *S. cerevisiae* is that it  
191 functions as a platform for testing our current understanding of the system in a non-  
192 native background. Such a platform would allow introduction and exclusion of *e.g.*  
193 various proteins and other factors component to test their role in the immune system.  
194 Finally, while we demonstrate interference in a eukaryote, further development could  
195 reconstitute the entire adaptive capability of the system. This would require  
196 expression of Cas1 and Cas2, and possibly also other factors such as IHF, indicated as  
197 important for adaptation (18). As Richard Feynman stated, “what I cannot create I do  
198 not understand”.

199

## 200 **Materials and Methods**

### 201 Strains and culture media

202 All cloning work was done in *E. coli* strain Top10. *E. coli* was cultured in Lysogeny  
203 Broth (LB) with aeration at 37°C. When necessary, the media was supplemented with  
204 kanamycin (50 µg/ml), ampicillin (100 µg/ml), streptomycin (50 µg/ml), tetracycline  
205 (25 µg/ml), and chloramphenicol (15 µg/ml). For experiments in yeast *Saccharomyces*  
206 *cerevisiae* W303 and BY418 strains were used. *S. cerevisiae* BY418 have full  
207 deletion of chromosomal copies of genes used for selection, unlike W303 where they  
208 are inactivated by point mutations. Yeast cells were cultured in SC medium (Yeast  
209 nitrogen base 0.34 %, ammonium sulfate 0.5%, raffinose 2%, quadruple SC dropout

210 mix (CSM, -His, -Leu, -Trp, -Ura; Formedium™, UK) at the rate of 1400 mg/L of  
211 medium, pH 5.6 ). For certain induction experiments SC medium with 1% raffinose  
212 was used. When necessary, the media was supplemented with adenine sulfate (80  
213 µg/ml), uracil (20 µg/ml), tryptophan (40 µg/ml), histidine (20 µg/ml), and leucine (60  
214 µg/ml). 1.5% agar was included in the medium to prepare solid medium. Yeast strains  
215 were grown with aeration at 30°C. 2% galactose was added to the medium for  
216 induction of Gal promoter as required. For a complete list of strains used see table S1.

217

### 218 Construction of vector expressing Cascade complex

219 A Gal1-10 promoter cassette from pRS425Gal was cloned between EcoRI/BamHI  
220 sites of pBlueScript II SK (+) resulting in pUDM101. All *cas* genes were amplified by  
221 colony PCR from *E. coli* MG1655, see table S2 for a complete list of primers. The  
222 *cse1* and *cse2* genes were serially cloned into the pUDM101 XbaI and EcoRI sites,  
223 respectively, to generate pUDM107. Similarly, *cas7* and *cas6e* were serially cloned in  
224 pRS425Gal BamHI and SalI sites, respectively, to generate pUDM108. The four  
225 genes were combined by subcloning a HindIII-NotI blunt fragment from pUDM107  
226 into the blunted SacI site of pUDM108, thereby generating pUDM109. The *cas5e*  
227 gene was cloned into pRS425Gal vector to generate pUDM110. CYC1 terminator  
228 cassette was PCR amplified from pYES2 and subcloned into PstI site of pBlueScript  
229 II SK (+) to generate pUDM102. A CYC1-*cas5e*-CYC1 cassette was constructed by  
230 serially cloning EcoRV-SmaI fragment from pUDM102 into the SalI and SpeI sites  
231 respectively of pUDM110 to generate pUDM315. Using XhoI and NotI this cassette  
232 was excised from pUDM315, blunted and sub-cloned into the NotI site of pUDM109  
233 to generate the final Cascade-expressing construct, pCascade. See table S3 for  
234 complete list of plasmids used in this study.

235

236 Construction of vectors expressing Cas3 or Cas3-Cse1 fusion

237 The *cas3* gene was PCR amplified from MG1655 to introduce flanking EcoRI sites  
238 and cloned into the EcoRI site of pRS423Gal resulting in the Cas3-expressing plasmid  
239 pCas3. A Cas3-Cse1 fusion fragment was amplified from pWUR657 and cloned  
240 between the SpeI and NotI sites of pRS423Gal to generate pCas3::Cse1 expressing  
241 the Cas3-Cse1 fusion.

242

243 Construction of vectors expressing CRISPR RNA

244 For expression of crRNA, two CRISPR cassettes, one containing 4xJ3 spacer (13)  
245 PCR amplified from pWUR630 and the other containing J1-J2 spacers (a synthetic  
246 array ordered from ThermoFisher Scientific Inc.) were cloned into BamHI-NotI sites  
247 of pRS424Gal\_Cyc1 to place CYC1 terminator directly downstream of the CRISPR  
248 array. All spacers targeted the J gene from bacteriophage Lambda. The J1-J2  
249 CRISPR, along with the flanking CYC1 terminator, was excised as a BamHI-SacI  
250 fragment and cloned in pCas3 cut with the same sites to generate pCRISPR+Cas3.  
251 Additionally, the same BamHI-SacI fragment was blunted and cloned in the blunted  
252 Sall site of pCas3::Cse1 to generate pCRISPR+Cas3::Cse1. See table S4 for details of  
253 CRISPR and targets.

254 For expression crRNA in *E. coli*, a minimal CRISPR array with 54 nt of the leader,  
255 the J3 spacer and two repeats was cloned into pZE12Luc (19) under the control of  
256 PLlacO-1. The plasmid was amplified using primers PLlacO-C and pZE-Xba and the  
257 minimal CRISPR array was amplified from pWUR564 (13) using primers LA009 and  
258 LA013. The array was cloned by blunt-end ligation in the leader-end so that the first

259 position of the partial leader corresponds to transcription start of the PLlacO-1 and in  
260 the other end into the XbaI-site of pZE12Luc.

261

### 262 Construction of *S. cerevisiae* expressing type I-E CRISPR-Cas system

263 The vectors constructed as described above were transformed into the desired yeast  
264 strains as required. Transformation of *S. cerevisiae* was performed using lithium  
265 acetate method (20).

266

### 267 Construction of target vectors

268 To construct pTargetHigh, the 350 bp region of Lambda J from pWUR610 was  
269 cloned into the BamHI and HindIII sites of pRS426Gal. The cloning replaced the Gal-  
270 promoter fragment with the lambda DNA fragment. A low copy target vector,  
271 pTargetLow, was constructed by PCR amplification of a region of Lambda J gene  
272 using pTargetHigh as template with DR0015 and DR0016 primers and cloning the  
273 fragment in the NheI site of pPS1739.

274

### 275 Analysis of crRNA processing

#### 276 *Sample preparation and RNA purification: Yeast*

277 *S. cerevisiae* W303 carrying pCascade, pCRISPR (4xJ3 spacer), and pCas3 was  
278 grown to stationary phase, diluted in fresh SC medium and grown with aeration at  
279 32°C to an OD<sub>600</sub> value of 0.3. Galactose was then added to induce the CRISPR-Cas  
280 system. 10 ml culture was harvested by centrifugation 2, 4, and 5 hours after  
281 induction. Total RNA was isolation using the hot phenol method (21).

#### 282 *Sample preparation and RNA purification: Bacteria*

283 Overnight culture of *E. coli* BL21AI harboring pWUR397 (Cas3), pWUR400  
284 (Cascade) and pLA002 (minimal J3 CRISPR array), was diluted and grown to OD<sub>600</sub>  
285  $\approx$  0.3. Cas-protein and crRNA expression was induced by addition of 0.2 % arabinose  
286 and 1 mM IPTG. After 30 min, 5 ml sample was taken and mixed with 1 ml stop  
287 solution (5 % phenol, 95 % ethanol), and pelleted at 4 °C. RNA was purified as  
288 previously described (22).

### 289 *Gel and blotting*

290 Samples were run on a 10% denaturing polyacrylamide gel (10 % polyacrylamide, 7  
291 M urea, 1X Tris-borate-EDTA (TBE)) in 1X TBE. Samples were mixed with loading  
292 dye (95 % deionized formamide, 0.5 mM EDTA, 0.025 % bromphenol blue/xylene  
293 cyanol, and 0.025 % SDS), and boiled 3 min prior to loading. The same was done  
294 with the pre-labelled pUC8 size marker. 15  $\mu$ g of total RNA was loaded for each  
295 sample. As a positive control for processed crRNA, total RNA purified from the *E.*  
296 *coli* BL21AI carrying pWUR 397, pWUR400 and pLA002, able to prevent phage  
297 infection and plasmid transformation (data not shown), was also loaded on the gel.  
298 Transfer to Hybond N+ membrane (Amersham) was done at 4°C overnight at 200  
299 mA. The membrane was UV crosslinked and prehybridized in Church buffer (0.25M  
300 sodium phosphate buffer pH 7.2, 1 mM EDTA, and 7% SDS) for 1 h at 42°C after  
301 which 0.5  $\mu$ M of radioactively labelled probe was added to the buffer. Hybridization  
302 was done overnight. The membrane was washed two times 5 min with 2x SSC, 0.1%  
303 SDS and exposed the PharosFX-system (BioRad).

304 The pUC8 size marker (Fermentas) was radioactively labeled using  $\gamma$ -<sup>32</sup>P-ATP  
305 (PerkinElmer) and PNK (Fermentas) in an exchange reaction according to the  
306 manufacturer's instructions. The probe, LA014, was labelled the same way in a  
307 forward reaction. Excess  $\gamma$ -<sup>32</sup>P-ATP was removed using Illustra ProbeQuant G-50

308 Micro column (GE Healthcare) purification according to the manufacturer's

309 instructions.

310

### 311 CRISPR-Cas activity assays

312 CRISPR-Cas activity was assessed by plasmid interference assays. Yeast cultures

313 grown to stationary phase and diluted in fresh SC medium containing either 1% or 2%

314 raffinose as carbon source and grown with aeration at 32°C to an OD<sub>600</sub> value of 0.2,

315 followed by addition of galactose inducer. 150-240 min after induction the cells were

316 harvested by centrifugation. The cells were then transformed with target vectors or

317 non-target control vectors using lithium acetate method (20), but excluding carrier

318 DNA. Plasmid interference by the CRISPR-Cas system was measured by plating

319 cultures transformed with target vector or non-target vector on selective media and

320 comparing TE.

321

### 322 Surveyor assay

323 *S. cerevisiae* BY418 cells harboring pCascade, pCRISPR, and pCas3::Cse1, or

324 negative controls lacking pCRISPR, pCascade or both were grown in SC medium

325 with or without the galactose inducer and transformed with pTargetHigh. The

326 transformed cells were grown for 24 hours in SC medium, pelleted by centrifugation

327 and grown again in equal volume of fresh medium for 24 hours. 1.5 ml of the culture

328 was pelleted by centrifugation and resuspended in 500 µl of distilled water. The cells

329 were lysed by heating at 98°C for 10 minutes and 0.5 µl of the lysate was used as

330 template for PCR with primers DR003 and DR004 to amplify the target region. The

331 PCR products were analyzed by electrophoresis on 2 % agarose gel and used for

332 mutation detection with Surveyor mutation detection kit (IDT) as per manufacturer's

333 instructions. The result of Surveyor assay was analyzed by Qiagen QIAxcel advanced  
334 gel electrophoresis system.

335

### 336 **Acknowledgements**

337 We are deeply grateful to Erik Johansson (Umeå University), Hans Ronne (Swedish  
338 University of Agricultural Sciences), Gerhart Wagner (Uppsala University), Pernilla  
339 Bjerling (Uppsala University) and their respective research groups for providing  
340 assistance, strains, and plasmids for this project. This project was funded by the  
341 Wenner-Gren Foundations, the Swedish Research Council and the Royal Swedish  
342 Academy of Sciences.

343

### 344 **Author Contributions**

345 ML conceived the concept. DR, GB, and ML performed experimental design and DR,  
346 LA, and GB performed the experiments. DR and ML analyzed the data and wrote the  
347 article.

348

### 349 **Conflict of Interest**

350 The authors declare no conflict of interest.

351

352 **References**

- 353 1. Barrangou R, Fremaux C, Deveau H, Richards M, Boyaval P, Moineau S,  
354 Romero DA, Horvath P. 2007. CRISPR provides acquired resistance  
355 against viruses in prokaryotes. *Science* 315:1709-12.
- 356 2. Rath D, Amlinger L, Rath A, Lundgren M. 2015. The CRISPR-Cas immune  
357 system: Biology, mechanisms and applications. *Biochimie*  
358 doi:10.1016/j.biochi.2015.03.025.
- 359 3. Koonin EV, Makarova KS, Zhang F. 2017. Diversity, classification and  
360 evolution of CRISPR-Cas systems. *Curr Opin Microbiol* 37:67-78.
- 361 4. Makarova KS, Wolf YI, Alkhnbashi OS, Costa F, Shah SA, Saunders SJ,  
362 Barrangou R, Brouns SJ, Charpentier E, Haft DH, Horvath P, Moineau S,  
363 Mojica FJ, Terns RM, Terns MP, White MF, Yakunin AF, Garrett RA, van der  
364 Oost J, Backofen R, Koonin EV. 2015. An updated evolutionary  
365 classification of CRISPR-Cas systems. *Nat Rev Microbiol* 13:722-36.
- 366 5. White MK, Hu W, Khalili K. 2015. The CRISPR/Cas9 genome editing  
367 methodology as a weapon against human viruses. *Discov Med* 19:255-62.
- 368 6. Ebina H, Misawa N, Kanemura Y, Koyanagi Y. 2013. Harnessing the  
369 CRISPR/Cas9 system to disrupt latent HIV-1 provirus. *Sci Rep* 3:2510.
- 370 7. Brouns SJ, Jore MM, Lundgren M, Westra ER, Slijkhuys RJ, Snijders AP,  
371 Dickman MJ, Makarova KS, Koonin EV, van der Oost J. 2008. Small CRISPR  
372 RNAs guide antiviral defense in prokaryotes. *Science* 321:960-4.
- 373 8. Westra ER, van Erp PB, Kunne T, Wong SP, Staals RH, Seegers CL, Bollen S,  
374 Jore MM, Semenova E, Severinov K, de Vos WM, Dame RT, de Vries R,  
375 Brouns SJ, van der Oost J. 2012. CRISPR immunity relies on the



- 376 consecutive binding and degradation of negatively supercoiled invader  
377 DNA by Cascade and Cas3. *Mol Cell* 46:595-605.
- 378 9. Sapranaukas R, Gasiunas G, Fremaux C, Barrangou R, Horvath P, Siksnys  
379 V. 2011. The *Streptococcus thermophilus* CRISPR/Cas system provides  
380 immunity in *Escherichia coli*. *Nucleic Acids Res* 39:9275-82.
- 381 10. Swarts DC, Mosterd C, van Passel MW, Brouns SJ. 2012. CRISPR  
382 interference directs strand specific spacer acquisition. *PLoS One*  
383 7:e35888.
- 384 11. Marraffini LA, Sontheimer EJ. 2008. CRISPR interference limits horizontal  
385 gene transfer in staphylococci by targeting DNA. *Science* 322:1843-5.
- 386 12. Garneau JE, Dupuis ME, Villion M, Romero DA, Barrangou R, Boyaval P,  
387 Fremaux C, Horvath P, Magadan AH, Moineau S. 2010. The CRISPR/Cas  
388 bacterial immune system cleaves bacteriophage and plasmid DNA. *Nature*  
389 468:67-71.
- 390 13. Westra ER, Pul U, Heidrich N, Jore MM, Lundgren M, Stratmann T, Wurm  
391 R, Raine A, Mescher M, Van Heereveld L, Mastop M, Wagner EG, Schnetz K,  
392 Van Der Oost J, Wagner R, Brouns SJ. 2010. H-NS-mediated repression of  
393 CRISPR-based immunity in *Escherichia coli* K12 can be relieved by the  
394 transcription activator LeuO. *Mol Microbiol* 77:1380-93.
- 395 14. Rath D, Amlinger L, Hoekzema M, Devulapally PR, Lundgren M. 2015.  
396 Efficient programmable gene silencing by Cascade. *Nucleic Acids Res*  
397 43:237-46.
- 398 15. Xue C, Seetharam AS, Musharova O, Severinov K, Brouns SJ, Severin AJ,  
399 Sashital DG. 2015. CRISPR interference and priming varies with individual  
400 spacer sequences. *Nucleic Acids Res* 43:10831-47.

- 401 16. Zetsche B, Heidenreich M, Mohanraju P, Fedorova I, Kneppers J,  
402 DeGennaro EM, Winblad N, Choudhury SR, Abudayyeh OO, Gootenberg JS,  
403 Wu WY, Scott DA, Severinov K, van der Oost J, Zhang F. 2017. Multiplex  
404 gene editing by CRISPR-Cpf1 using a single crRNA array. *Nat Biotechnol*  
405 35:31-34.
- 406 17. Jinek M, Chylinski K, Fonfara I, Hauer M, Doudna JA, Charpentier E. 2012.  
407 A programmable dual-RNA-guided DNA endonuclease in adaptive  
408 bacterial immunity. *Science* 337:816-21.
- 409 18. Nunez JK, Bai L, Harrington LB, Hinder TL, Doudna JA. 2016. CRISPR  
410 Immunological Memory Requires a Host Factor for Specificity. *Mol Cell*  
411 62:824-33.
- 412 19. Lutz R, Bujard H. 1997. Independent and tight regulation of  
413 transcriptional units in *Escherichia coli* via the LacR/O, the TetR/O and  
414 AraC/I1-I2 regulatory elements. *Nucleic Acids Res* 25:1203-10.
- 415 20. Agatep RK, R.D.; Parchaliuk, D. L.; Woods, R. A.; Gietz, R. D. 1998.  
416 Transformation of *Saccharomyces cerevisiae* by the lithium  
417 acetate/single-stranded carrier DNA/polyethylene glycol protocol.  
418 *Technical Tips Online* 3:133-137.
- 419 21. Collart MA, Oliviero S. 2001. Preparation of yeast RNA. *Curr Protoc Mol*  
420 *Biol* Chapter 13:Unit13 12.
- 421 22. Blomberg P, Wagner EG, Nordstrom K. 1990. Control of replication of  
422 plasmid R1: the duplex between the antisense RNA, CopA, and its target,  
423 CopT, is processed specifically in vivo and in vitro by RNase III. *EMBO J*  
424 9:2331-40.
- 425

426 **Figures**

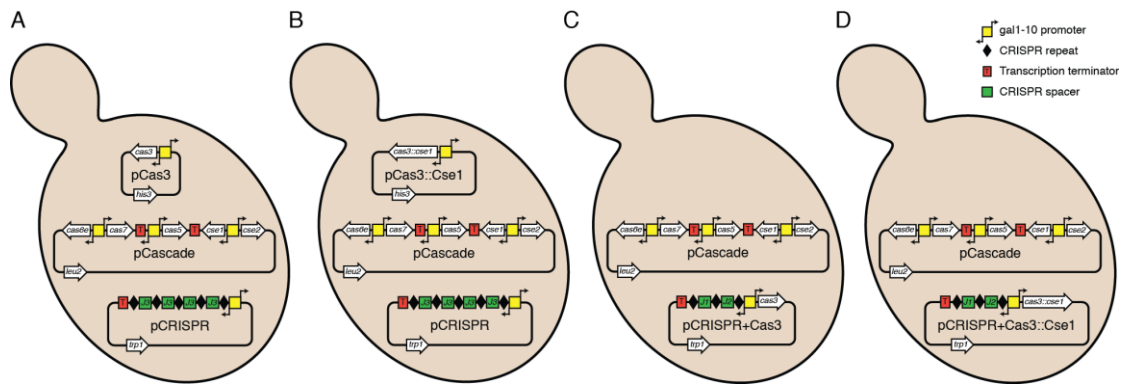

427

428 Figure 1. A-D: The different variants of the type I-E CRISPR-Cas system used for  
429 expression in *S. cerevisiae*.

430

431

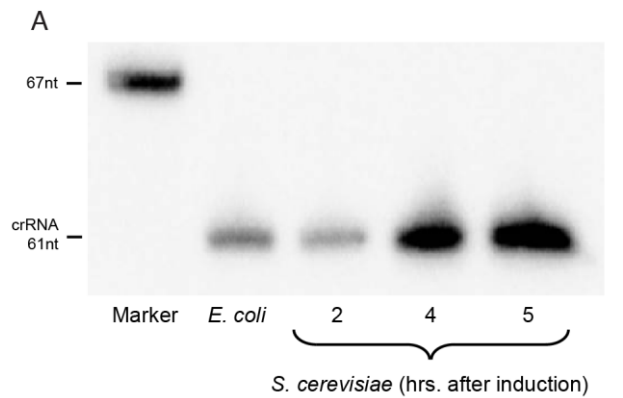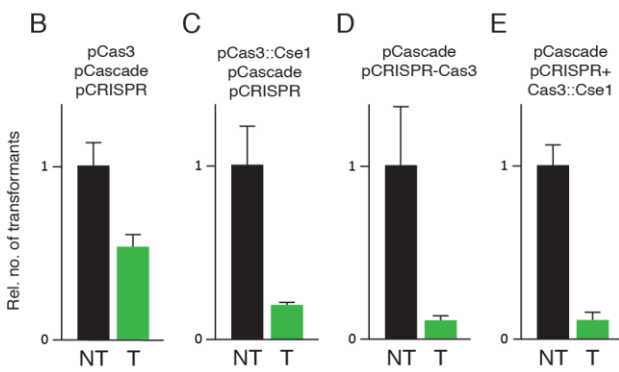

432

433 Figure 2. A: Analysis of crRNA by northern blot. *S. cerevisiae* samples were taken at  
434 indicated time points after induction of *cas* genes and 4xJ3 CRISPR array expression.

435 RNA from an *E. coli* strain active for interference was used as positive control. B-E:

436 Analysis of CRISPR-Cas interference on plasmids in different *S. cerevisiae* strains  
437 (A-B: W303, C-D: BY418) with indicated CRISPR-Cas expression system.  
438 Transformation efficiency was measured for plasmids containing a target sequence  
439 (T) and non-targeted parent plasmids (NT). Data in B-E is an average of three  
440 independent biological replicates normalized so that relative level of transformation  
441 by the non-target plasmid is equal in the different panels. Error bars indicate one  
442 standard deviation.
